# Supplementary material for: A Plastid-Bound Ankyrin Repeat Protein Controls Gametophyte and Early Embryo Development in Arabidopsis thaliana
Source: Front Plant Sci. 2022 Mar 8;13:767339. doi: 10.3389/fpls.2022.767339 (PMC8958021; doi:10.3389/fpls.2022.767339)
Supplement: Supplementary Table S1 — List of primers used in this study. [file Table_1.XLSX]

## Sheet: primer list
		Primer list
		Name	Sequence 5'-3'
		AT5G66055 genotyping primers
		GK_876D05_LP	CAGATCCAGTATCTGAAGCGC
		GK_876D05_RP	AACCTCTCCGTCTCGTCTTTC
		SAIL_98_F02 _LP	AACCGGGTAACAAAACCATTC
		SAIL_98_F02 _RP	CATCTAATCTCTTAGCCCCGC
		AT6G66060 genotyping primers
		SALK_098611C_LP	TTGGTTTCACAGACAACCCTC
		SALK_098611C_RP	GCGAAGATGATTCAAAGAACG
		SAIL_595_H12_LP	CCTCCTCAACATCTGATCTGC
		SAIL_595_H12_RP	CGTGATTTTGATTCTTCTCGC
		SAIL_1262_D08_LP	TGCTCTGCATGTTGTAGCATC
		SAIL_1262_D08_RP	CTTCGCCGTATTGATCATGTC
		qRT-PCR primers
		Reference gene
		EF1alpha4_LP	TGAGCACGCTCTTCTTGCTTTCA
		EF1alpha4_RP	GGTGGTGGCATCCATCTTGTTACA
		Long isoform
		QATE2036_F	ACCTGCTGAGGGAATCGGCAA
		QATE2036_EXJU_R	CACCCGTCCCTGTCCTGAG
		Short isoform
		QATE2036_F	ACCTGCTGAGGGAATCGGCAA
		E20_SHORT_CDS_RP	TCATCCTACCCTGTCCTGAG
		Cloning primers
		Sequencing primers
		E2_SEQ_1	TAGCGCAGGAGATGGAGTTCG
		E2_SEQ_2	AACAGAAGCTCTGGGTTCCCA
		E2_SEQ_3	AAGTAAGGCCCATTAGAAAGTGAG
		E2_SEQ_4	AACCGATGTGGTATGTCTGAC
		E2_SEQ_5	TCAGGACGGGTGGACTC
		Promoter cloning
		proE2036_LP_DTOPO	CACCATTGAGTGAAAAGTATAAAAC
		proE2036_RP_DTOPO	TATCGGAATAATCTTGAATAACGG
		CDS cloning long isoform
		cdsE2036_LP_DTOPO	CACCATGCAGTCACTCTCCACC
		cdsE2036_RPnostop_DTOPO	TCCTACCCTGTCCTGAGCGTT
		CDS cloning short isoform
		cdsE2036_LP_DTOPO	CACCATGCAGTCACTCTCCACC
		E20_SHORT_CDS_RP	TCATCCTACCCTGTCCTGAG
		Genomic fragment cloning
		proE2036_LP_DTOPO	CACCATTGAGTGAAAAGTATAAAAC
		cdsE2036_RPnostop_DTOPO	TCCTACCCTGTCCTGAGCGTT
